# Supplementary material for: Unveiling the potential of deep eutectic solvents to improve the conformational and colloidal stability of immunoglobulin G antibodies
Source: Royal Society of Chemistry journal article supplement (doi:10.1039/d2gc03415h), 2022-12-22
Supplement: d2gc03415h1.pdf [file d2gc03415h1.pdf]

## Supporting Information

### **Unveiling the potential of deep eutectic solvents to improve the conformational and colloidal stability of immunoglobulin G antibodies**

Diksha Dhiman<sup>a</sup>, Ana S. C. Marques<sup>b</sup>, Meena Bisht<sup>a,b</sup>, Ana P. M. Tavares<sup>b</sup>, Mara G. Freire<sup>b\*</sup> and Pannuru Venkatesu<sup>a\*</sup>

<sup>a</sup>Department of Chemistry, University of Delhi, Delhi-110 007, India

<sup>b</sup>CICECO-Aveiro Institute of Materials, Department of Chemistry, University of Aveiro, 3810-193 Aveiro, Portugal

## Results

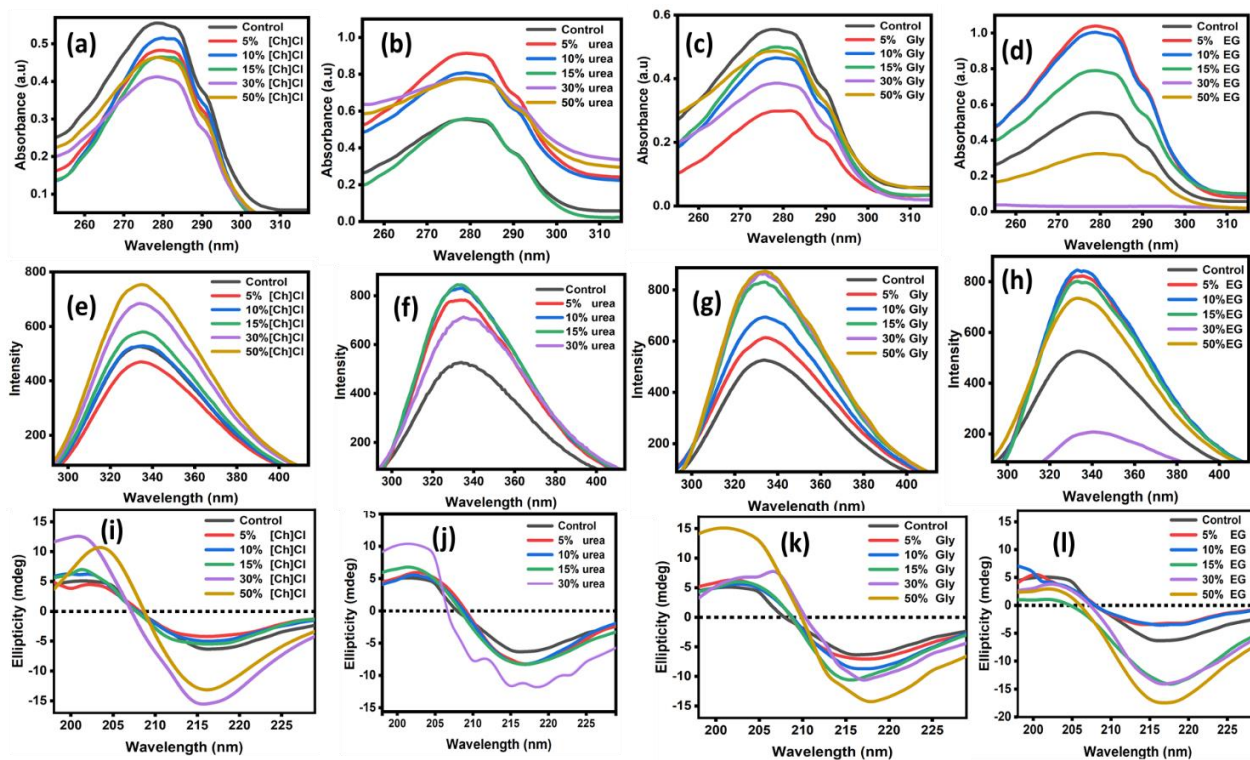

**Fig. S1.** Spectroscopic analysis of IgG. (a) (b) and (c) are UV visible absorption spectra; (d), (e) and (f) are fluorescence emission spectra; (g), (h) and (i) are far-UV CD spectra in the presence of sodium phosphate buffer pH 7.0, 10 mM (control) and at various concentrations of [Ch]Cl, Urea, Gly and EG at 25 °C.

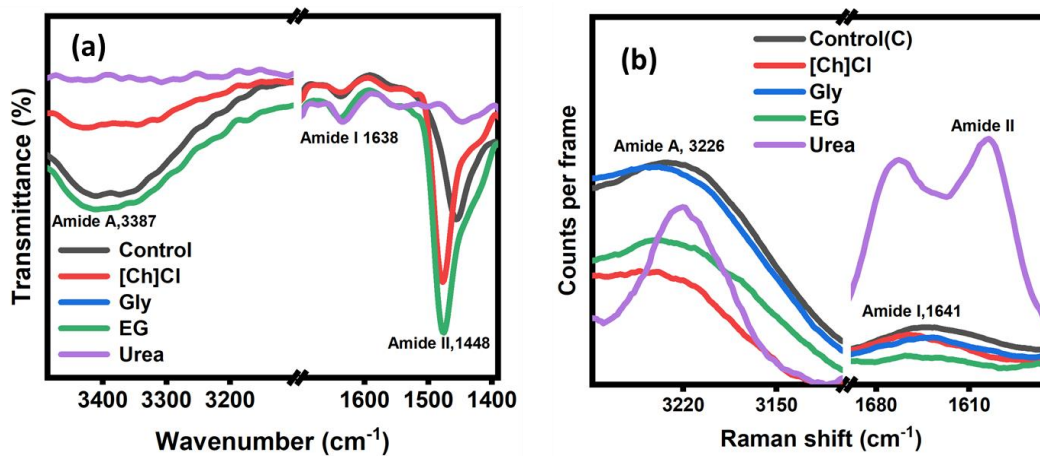

**Fig. S2.** (a) FT-IR spectra of IgG at 25°C in the presence of control and at 30% of DESs. (b) Raman spectra of IgG at 25°C in the presence of control and at 30% of DESs.

## Thermodynamic stability studies of IgG

Sigmoidal fluorescence intensity curves were obtained for IgG in the presence of various concentrations of DESs. As indicated by Eqs. (1-3) below, the fractions of folded protein ( $f_f$ ) and unfolded protein ( $f_u$ ) are determined by combining the intensity,  $Y$ , of protein found at a temperature,  $T$ , with the experimentally observed intensities of the pre- and post-transition values, and, respectively, of the native and denatured  $Y_f$  and  $Y_u$  protein. Using a linear fitting method, the latter values are obtained by extrapolating the pre- and post-transition baseline values. Upon each change in temperature, the system is assumed to be at thermal equilibrium. It is then possible to use Eq. 4 to define an effective equilibrium constant,  $K$ . This equilibrium constant is related to the standard free energy of formation, according to Eq. 5. The condition can define the melting temperature,  $Y=1/2 (Y_f + Y_u)$ , for which  $K=1$  and  $\Delta_{fu} G = 0$ .

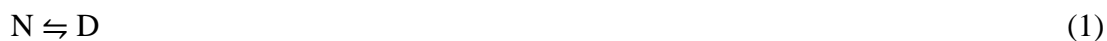

$$f_u = (Y_f - Y) / (Y_f - Y_u) \quad (2)$$

$$f_u + f_f = 1 \quad (3)$$

$$K = f_u / f_f = (Y_f - Y) / (Y - Y_u) \quad (4)$$

$$\Delta_{fu} G = -RT \ln K \quad (5)$$

$$\Delta_{fu} H = T_m \Delta_{fu} S \quad (6)$$

If  $\Delta C_p$  represent the difference in the isobaric heat capacities of the two forms of the protein, the integral of the Gibbs – Helmholtz equation leads to Eq. (7).<sup>1,2</sup>

$$\Delta_{fu} G (T) = \Delta_{fu} H (T_m) [1 - (T/T_m)] + \Delta C_p [(T - T_m) - T \ln (T/T_m)] \quad (7)$$

### References:

- (1) P. Venkatesu, M. J. Lee and H. M. Lin, *Journal of Physical Chemistry B*, 2009, **113**, 5327–5338.
- (2) M. M. Santoro and D. W. Bolen, *Biochemistry*, 2002, **31**, 4901–4907.

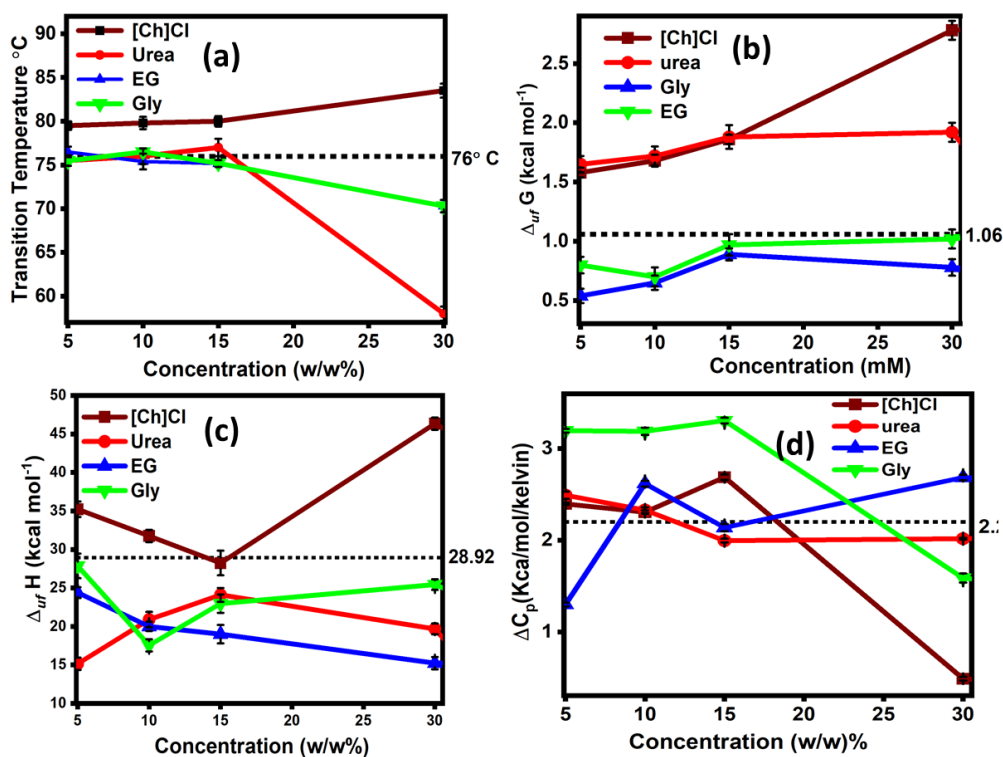

**Fig. S3.** Thermodynamic studies of IgG at 25°C in the presence of sodium phosphate buffer pH 7.0, 10 mM (control) and as a function of concentration of DESs. (a) transition temperature ( $T_m$ ); (b) Gibbs free energy changes ( $\Delta_{fu}G$ ); (c) enthalpy change ( $\Delta_{fu}H$ ) of unfolding; and (d) heat capacity change of unfolding ( $\Delta C_p$ ).

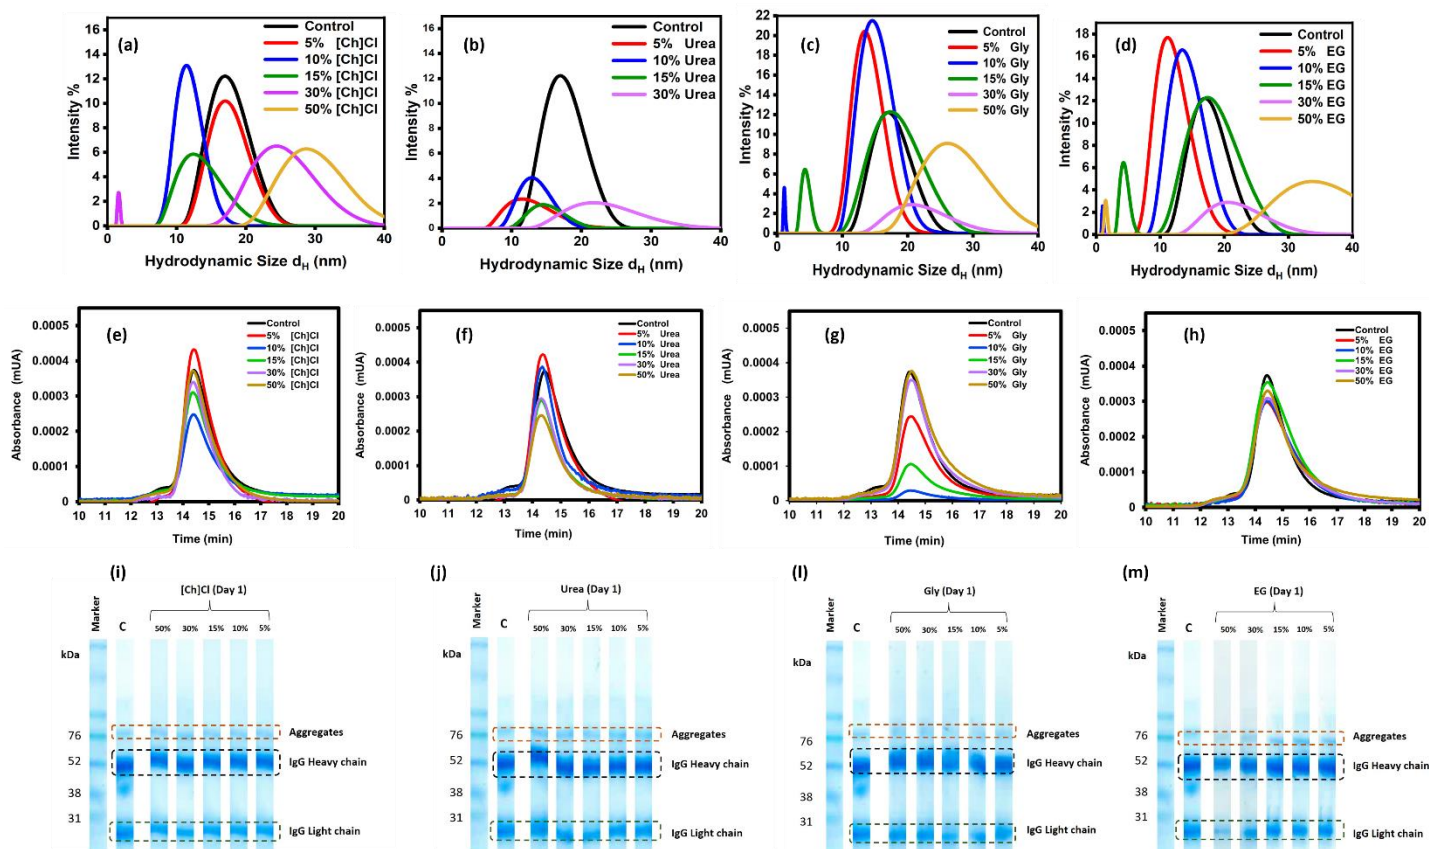

**Fig. S4.** Analysis of aggregation of IgG at 25 °C in the presence of sodium phosphate buffer pH 7.0, 10 mM (control) and as a function of the concentration of DESs. (a), (b), (c) and (d) size-distribution plot. (e), (f), (g) and (h) SE-HPLC spectra. (i), (j), (l) and (m) SDS-PAGE.

## Time-dependent studies of IgG stability in the presence of cholinium-based DESs

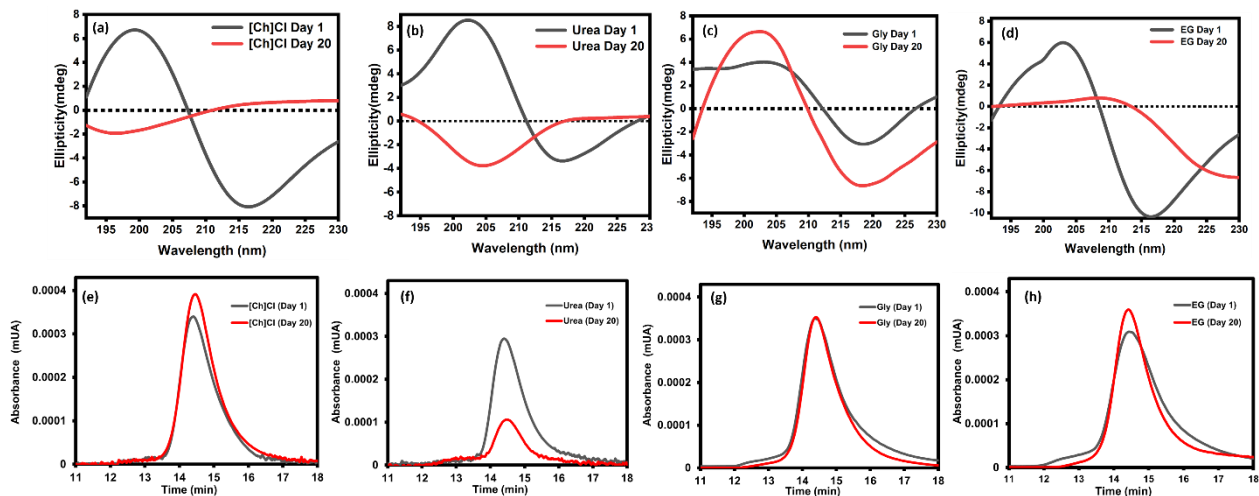

**Fig. S5.** Ellipticity versus wavelength as a function of time at 30% (a) [Ch]Cl; (b) urea; (c) Gly; and (d) EG. SE-HPLC chromatogram of IgG as a function of time at 30 % (e) [Ch]Cl; (f) urea; (g) Gly; and (h) EG.

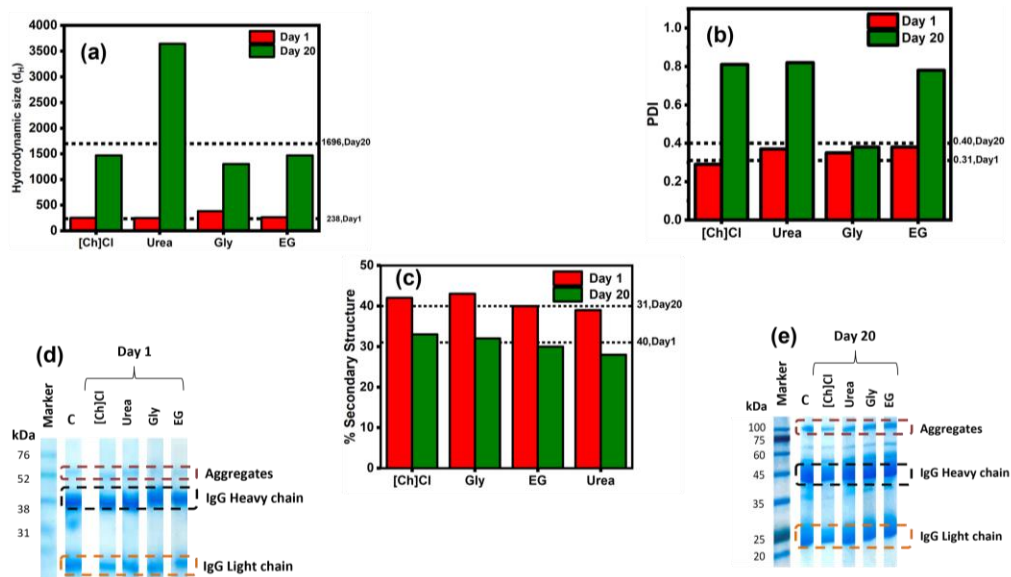

**Fig. S6.** (a) and (b) Aggregation studies of IgG as a function of time by calculating hydrodynamic size and PDI of IgG in the presence of 30% [Ch]Cl, urea, Gly and EG. (c) percentage secondary structure of IgG as a function of time. (d) and (e) SDS-PAGE spectra of IgG as a function of time, a1- day 1, a2- day 20. Lane 1 – molecular weight marker; lane 2 – IgG in sodium phosphate buffer pH 7.0, 10 mM (Control (C)) and DESs components at 30%.



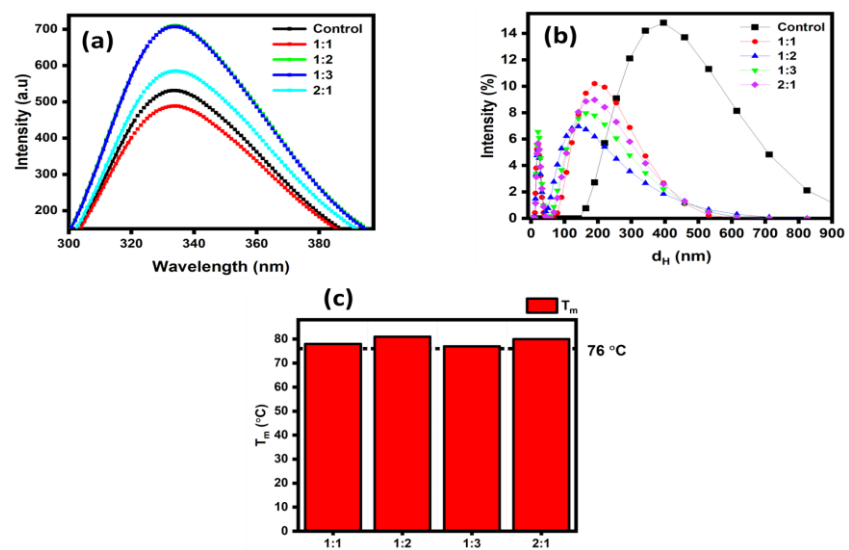

**Fig. S7.** (a) Fluorescence spectroscopy analysis; (b) hydrodynamic size as function of intensity of IgG in the presence of control and different DESs composition; and (c) bar graph of transition temperature ( $T_m$ ) versus different composition of DESs; black dotted line reflects  $T_m$  of IgG in the presence of buffer.

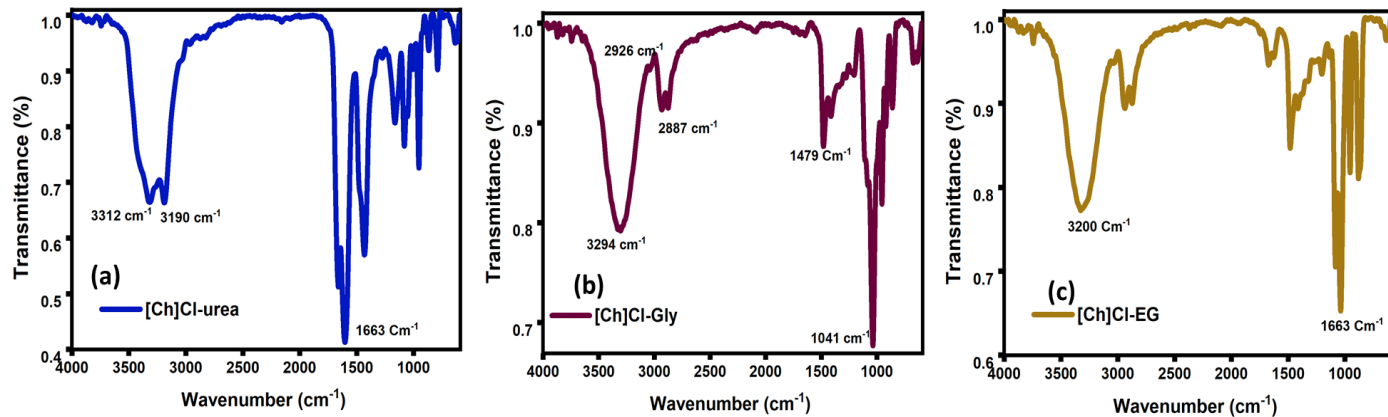

**Fig. S8.** FTIR spectra of DESs: (a) ChCl-urea (b) ChCl-Gly and (c) ChCl-EG.

**Table S1.** Wavenumber shift of IgG as a function of transmittance in various concentrations of [Ch]Cl-EG, [Ch]Cl, urea, Gly and EG.

| <b>Solvent</b> | <b>Wavenumber<br/>(nm) Amide A</b> | <b>Wavenumber<br/>(nm) Amide I</b> | <b>Wavenumber<br/>(nm) Amide II</b> |
|----------------|------------------------------------|------------------------------------|-------------------------------------|
| Control        | 3390                               | 1641                               | 1455                                |
| Ch]Cl-urea     | 3390                               | 1641                               | 1448                                |
| [Ch]Cl-Gly     | 3390                               | 1641                               | 1448                                |
| [Ch]Cl-EG      | 3390                               | 1641                               | 1449                                |
| [Ch]Cl         | 3430                               | 1638                               | 1476                                |
| Gly            | 3407                               | 1638                               | 1477                                |
| EG             | 3409                               | 1638                               | 1476                                |
| Urea           | -                                  | 1639                               | 1449                                |

**Table S2.** Raman shift of IgG as a function of transmittance in various concentrations of [Ch]Cl-urea, [Ch]Cl-Gly, [Ch]Cl-EG, [Ch]Cl, urea, Gly and EG.

| Solvent     | Raman Shift (nm) |         |
|-------------|------------------|---------|
|             | Amide A          | Amide I |
| Control     | 3233             | 1643    |
| [Ch]Cl-urea | 3252             | 1652    |
| [Ch]Cl-Gly  | 3252             | 1652    |
| [Ch]Cl-EG   | 3234             | 1600    |
| [Ch]Cl      | 3237             | 1652    |
| Gly         | 3237             | 1643    |
| EG          | 3247             | 1652    |
| Urea        | 3220             | 1593    |

**Table S3.** Transition temperature ( $T_m$ ), Gibbs free energy change of unfolding ( $\Delta_{fu}G$ ), Enthalpy change ( $\Delta_{fu}H$ ), Entropy change ( $\Delta_{fu}S$ ) and heat capacity change ( $C_p$ ) of unfolding at 25 °C, determined by thermal fluorescence analysis of thermal denaturation of IgG in absence and presence of cholinium-based DESs at various concentrations.

|                    | $T_m$ (°C) | $T_m$ (K)   | $\Delta_{fu}G$<br>(kcal/mol) | $\Delta_{fu}S$<br>(kcal/mol) | $\Delta_{fu}H$<br>(kcal mol <sup>-1</sup> ) | $\Delta C_p$<br>(kcal mol <sup>-1</sup> ) |
|--------------------|------------|-------------|------------------------------|------------------------------|---------------------------------------------|-------------------------------------------|
| 0                  | 76.0 ± 0.9 | 349.0 ± 0.9 | 1.06 ± 0.04                  | 0.08                         | 28.9 ± 1.2                                  | 0.29 ± 1.4                                |
| <b>[Ch]Cl-urea</b> |            |             |                              |                              |                                             |                                           |
| 5%                 | 76.9 ± 0.3 | 351.0 ± 0.3 | 1.59 ± 0.05                  | 0.25                         | 87.8 ± 0.9                                  | 1.75 ± 0.07                               |
| 10%                | 77.5 ± 0.2 | 349.8 ± 0.2 | 1.91 ± 0.09                  | 0.31                         | 80.4 ± 1.1                                  | 2.15 ± 0.05                               |
| 15%                | 78.0 ± 0.2 | 350.4 ± 0.2 | 2.23 ± 0.1                   | 0.30                         | 85.1 ± 1.0                                  | 2.21 ± 0.04                               |
| 30%                | 78.5 ± 0.4 | 350.5 ± 0.2 | 2.62 ± 0.2                   | 0.11                         | 112.0 ± 1.2                                 | 1.74 ± 0.02                               |
| 50%                | 76.9 ± 0.4 | 335.0 ± 0.4 | 1.17 ± 0.01                  | 0.04                         | 12.4 ± 1.0                                  | 2.95 ± 0.03                               |
| <b>[Ch]Cl-Gly</b>  |            |             |                              |                              |                                             |                                           |
| 5%                 | 76.7 ± 0.3 | 344.7 ± 0.3 | 1.59 ± 0.05                  | 0.15                         | 51.7 ± 0.5                                  | 1.68 ± 0.02                               |
| 10%                | 77.9 ± 0.2 | 347.9 ± 0.2 | 1.84 ± 0.08                  | 0.36                         | 86.8 ± 1.2                                  | 1.96 ± 0.02                               |
| 15%                | 78.8 ± 0.2 | 348.8 ± 0.2 | 2.12 ± 0.05                  | 0.33                         | 95.1 ± 0.7                                  | 2.1 ± 0.1                                 |
| 30%                | 80.0 ± 0.4 | 353.0 ± 0.4 | 2.98 ± 0.04                  | 0.06                         | 125.2 ± 0.4                                 | 0.87 ± 0.06                               |
| 50%                | 76.0 ± 0.4 | 349.0 ± 0.4 | 1.93 ± 0.07                  | 0.11                         | 38.4 ± 2.0                                  | 3.92 ± 0.08                               |

**[Ch]Cl-EG**

|     |            |             |             |      |             |             |
|-----|------------|-------------|-------------|------|-------------|-------------|
| 5%  | 76.0 ± 0.2 | 349.0 ± 0.2 | 1.41 ± 0.06 | 0.20 | 46.76 ± 1.2 | 2.71 ± 0.08 |
| 10% | 76.1 ± 0.2 | 349.0 ± 0.2 | 1.80 ± 0.07 | 0.32 | 68.7 ± 0.8  | 2.3 ± 1.0   |
| 15% | 76.5 ± 0.2 | 349.5 ± 0.2 | 1.89 ± 0.08 | 0.28 | 72.9 ± 1.5  | 2.5 ± 0.9   |
| 30% | 76.5 ± 0.4 | 349.5 ± 0.4 | 1.95 ± 0.08 | 0.15 | 98.0 ± 1.1  | 1.3 ± 1.2   |
| 50% | 74.0 ± 1.2 | 347.0 ± 0.4 | 1.8 ± 0.1   | 0.04 | 13.9 ± 0.7  | 3.4 ± 0.9   |

**[Ch]Cl**

|     |            |             |             |      |            |             |
|-----|------------|-------------|-------------|------|------------|-------------|
| 5%  | 79.5 ± 0.7 | 352.5 ± 0.7 | 1.58 ± 0.04 | 0.10 | 35.2 ± 1.0 | 2.4 ± 0.6   |
| 10% | 79.8 ± 0.9 | 352.8 ± 0.9 | 1.68 ± 0.04 | 0.09 | 31.8 ± 1.2 | 2.3 ± 0.5   |
| 15% | 80.0 ± 0.7 | 353.0 ± 0.7 | 1.86 ± 0.04 | 0.08 | 28.2 ± 1.5 | 2.68 ± 0.06 |
| 30% | 83.5 ± 0.8 | 356.5 ± 0.4 | 2.78 ± 0.08 | 0.13 | 46.3 ± 1.3 | 0.49 ± 0.05 |
| 50% | 54.0 ± 1.4 | 327.0 ± 0.7 | 2.93 ± 0.07 | 0.08 | 26.2 ± 0.9 | 0.19 ± 0.05 |

**Urea**

|     |            |             |             |       |            |             |
|-----|------------|-------------|-------------|-------|------------|-------------|
| 5%  | 75.5 ± 0.8 | 348.5 ± 0.5 | 0.80 ± 0.04 | 0.23  | 15.2 ± 0.8 | 2.49 ± 0.08 |
| 10% | 76.0 ± 0.9 | 349.0 ± 0.6 | 0.70 ± 0.07 | 0.22  | 20.9 ± 1.0 | 2.33 ± 0.04 |
| 15% | 77.0 ± 0.9 | 350.0 ± 0.9 | 0.97 ± 0.04 | 0.21  | 24.1 ± 0.9 | 1.99 ± 0.07 |
| 30% | 58.0 ± 0.7 | 331.0 ± 0.7 | 1.0 ± 0.7   | 0.06  | 19.7 ± 0.7 | 2.01 ± 0.05 |
| 50% | 43.6 ± 1.2 | 316.6 ± 1.2 | 1.3 ± 0.7   | -0.07 | 22.2 ± 0.9 | 2.10 ± 0.03 |

---

**EG**

|     |            |             |             |      |            |             |
|-----|------------|-------------|-------------|------|------------|-------------|
| 5%  | 75.5 ± 0.6 | 348.5 ± 0.6 | 0.54 ± 0.03 | 0.07 | 24.4 ± 1.7 | 1.29 ± 0.06 |
| 10% | 76.5 ± 0.5 | 349.5 ± 0.5 | 0.65 ± 0.07 | 0.24 | 20.9 ± 1.5 | 2.61 ± 0.09 |
| 15% | 75.2 ± 0.8 | 348.2 ± 0.8 | 0.89 ± 0.04 | 0.27 | 19.0 ± 1.2 | 2.13 ± 0.02 |
| 30% | 70.3 ± 0.9 | 343.3 ± 0.9 | 0.78 ± 0.03 | 0.19 | 15.2 ± 1.5 | 2.68 ± 0.08 |
| 50% | 51.7 ± 0.8 | 324.7 ± 0.7 | 0.56 ± 0.07 | 0.05 | 16.2 ± 1.2 | 2.00 ± 0.06 |

**Gly**

|     |            |             |              |      |            |             |
|-----|------------|-------------|--------------|------|------------|-------------|
| 5%  | 76.5 ± 0.4 | 349.5 ± 0.4 | 1.65 ± 0.05  | 0.28 | 27.9 ± 1.6 | 3.19 ± 0.02 |
| 10% | 75.4 ± 0.6 | 348.4 ± 0.6 | 1.72 ± 0.06  | 0.28 | 17.6 ± 1.3 | 3.18 ± 0.08 |
| 15% | 75.2 ± 0.6 | 348.2 ± 0.6 | 1.88 ± 0.04  | 0.29 | 22.9 ± 1.8 | 3.30 ± 0.06 |
| 30% | 86.0 ± 0.7 | 359.0 ± 0.7 | 1.92 ± 0.08  | 0.16 | 25.4 ± 1.3 | 1.58 ± 0.04 |
| 50% | 81.0 ± 0.9 | 354.0 ± 0.9 | -1.05 ± 0.07 | 0.13 | 10.0 ± 1.3 | 1.28 ± 0.07 |

**Table S4.** Hydrodynamic diameter ( $d_H$ ) values in various concentrations of [Ch]Cl-urea, [Ch]Cl-Gly, [Ch]Cl-EG, [Ch]Cl, urea, Gly and EG.

| Solvent (w/w%)     | Hydrodynamic size ( $d_H$ ) (nm) | PDI values |
|--------------------|----------------------------------|------------|
| <b>[Ch]Cl-urea</b> |                                  |            |
| 0                  | 15.07                            | 0.51       |
| 5%                 | 13.31                            | 0.44       |
| 10%                | 15.98                            | 0.37       |
| 15%                | 16.03                            | 0.47       |
| 30%                | 18.83                            | 0.59       |
| 50%                | 24.53                            | 0.69       |
| <b>[Ch]Cl-Gly</b>  |                                  |            |
| 5%                 | 10.90                            | 0.33       |
| 10%                | 13.23                            | 0.35       |
| 15%                | 14.37                            | 0.33       |
| 30%                | 17.86                            | 0.66       |
| 50%                | 31.34                            | 0.94       |
| <b>[Ch]Cl-EG</b>   |                                  |            |
| 5%                 | 14.96                            | 0.24       |
| 10%                | 14.99                            | 0.32       |
| 15%                | 18.04                            | 0.59       |
| 30%                | 20.08                            | 0.87       |
| 50%                | 30.73                            | 0.94       |
| <b>[Ch]Cl</b>      |                                  |            |
| 5%                 | 17.10                            | 0.41       |
| 10%                | 11.53                            | 0.42       |
| 15%                | 12.95                            | 0.56       |
| 30%                | 24.72                            | 0.78       |
| 50%                | 29.14                            | 0.97       |



---

**Urea**

|     |       |      |
|-----|-------|------|
| 5%  | 12.23 | 0.83 |
| 10% | 13.15 | 0.55 |
| 15% | 14.66 | 0.33 |
| 30% | 33.54 | 0.54 |

**Gly**

|     |       |      |
|-----|-------|------|
| 5%  | 13.61 | 0.30 |
| 10% | 14.80 | 0.43 |
| 15% | 17.54 | 0.42 |
| 30% | 21.21 | 0.95 |
| 50% | 26.57 | 0.62 |

**EG**

|     |       |      |
|-----|-------|------|
| 5%  | 12.61 | 0.25 |
| 10% | 14.80 | 0.33 |
| 15% | 16.54 | 0.32 |
| 30% | 18.21 | 0.75 |
| 50% | 21.57 | 0.42 |

**Table S5.** Values of the peak areas of the [Ch]Cl-Gly chromatograms shown in the Figure 4e.

| <b>Sample</b>  | <b>Area</b>            |
|----------------|------------------------|
| Control        | $1.395 \times 10^{-3}$ |
| [Ch]Cl-Gly 5%  | $1.375 \times 10^{-3}$ |
| [Ch]Cl-Gly 10% | $1.182 \times 10^{-3}$ |
| [Ch]Cl-Gly 15% | $9.605 \times 10^{-4}$ |
| [Ch]Cl-Gly 30% | $6.242 \times 10^{-4}$ |
| [Ch]Cl-Gly 50% | $5.329 \times 10^{-4}$ |

**Table S6.** Hydrodynamic diameter ( $d_H$ ) values in various concentrations of [Ch]Cl-urea, [Ch]Cl-Gly, [Ch]Cl-EG, [Ch]Cl, Gly, EG and urea on day 1 and day 20.

| <b>Day-1</b>          |                               |            |
|-----------------------|-------------------------------|------------|
| <b>Solvent System</b> | <b>Hydrodynamic size (dH)</b> | <b>PDI</b> |
| Control               | 238                           | 0.30       |
| [Ch]Cl-urea           | 166                           | 0.21       |
| [Ch]Cl-Gly            | 177                           | 0.24       |
| [Ch]Cl-EG             | 213                           | 0.23       |
| [Ch]Cl                | 252                           | 0.29       |
| EG                    | 264                           | 0.37       |
| Gly                   | 382                           | 0.35       |
| Urea                  | 249                           | 0.38       |
| <b>After day - 20</b> |                               |            |
| Control               | 1696                          | 0.49       |
| [Ch]Cl-urea           | 989                           | 0.45       |
| [Ch]Cl-Gly            | 1584                          | 0.48       |
| [Ch]Cl-EG             | 1610                          | 0.35       |
| [Ch]Cl                | 1468                          | 0.81       |
| EG                    | 1468                          | 0.78       |
| Gly                   | 1300                          | 0.38       |
| Urea                  | 4643                          | 0.82       |

**Table S7.** Transition temperature ( $T_m$ ) and hydrodynamic ( $d_H$ ) values of IgG in the presence of various DESs composition.

| [Ch]Cl:urea | Transition Temperature ( $^{\circ}\text{C}$ ) | Hydrodynamic size ( $d_H$ ) (nm) |
|-------------|-----------------------------------------------|----------------------------------|
| Control     | 76                                            | 414                              |
| 1:1         | 78                                            | 85                               |
| 1:2         | 81                                            | 196                              |
| 1:3         | 77                                            | 213                              |
| 2:1         | 80                                            | 204                              |
